# Supplementary material
Source: Springer Nature journal article supplement (https://www.springermedizin.de/resource/supplementary/13643_2013_95_MOESM2_ESM.pdf/9681476)
Supplement: MOESM2 [file 9681476]

| APPROACH TO TACKLING HEALTH INEQUALITY |                  | LEVEL OF INTERVENTION                                                                                                                                                                                                    |                                                                                                                                                                                                                                                                                                                                                                                             |                                                                                                                                                                          |                                                                                                                                                                                                                                              |
|----------------------------------------|------------------|--------------------------------------------------------------------------------------------------------------------------------------------------------------------------------------------------------------------------|---------------------------------------------------------------------------------------------------------------------------------------------------------------------------------------------------------------------------------------------------------------------------------------------------------------------------------------------------------------------------------------------|--------------------------------------------------------------------------------------------------------------------------------------------------------------------------|----------------------------------------------------------------------------------------------------------------------------------------------------------------------------------------------------------------------------------------------|
|                                        |                  | Individual                                                                                                                                                                                                               | Community                                                                                                                                                                                                                                                                                                                                                                                   | Societal                                                                                                                                                                 |                                                                                                                                                                                                                                              |
|                                        |                  | <i>Strengthening Individuals</i>                                                                                                                                                                                         | <i>Strengthening Communities</i>                                                                                                                                                                                                                                                                                                                                                            | <i>Improving Living and Work Environment</i>                                                                                                                             | <i>Promoting Healthy Macro Policies</i>                                                                                                                                                                                                      |
| <b>Disadvantage Gap</b>                | <i>Targeted</i>  | Health education, health promotion and social marketing; Diet and exercise advice and counselling; Weight management advice and monitoring; Conditional cash transfers; Lifestyle counselling; Exercise on prescription. | Community health and fitness centres; Health trainers; Group, work or community based exercise programmes; Group, work or community diet, lifestyle, or weight management advice and/or counselling; Healthy eating campaigns in workplaces; Group or community organised education or support; Localised point of sale social marketing; Neighbourhood based physical activity programmes. |                                                                                                                                                                          |                                                                                                                                                                                                                                              |
| <b>Gradient</b>                        | <i>Universal</i> |                                                                                                                                                                                                                          |                                                                                                                                                                                                                                                                                                                                                                                             | Access to physical fitness facilities (e.g. gym subsidies); Availability of healthy food; Green spaces, walk-ability and the built environment; Traffic light labelling. | Restrictions on advertising high fat and high sugar foods; Food prices and agricultural subsidies (e.g. changing the Common Agricultural Policy); Fiscal measures to regulate supply and demand (e.g. taxing high fat and high sugar foods). |
